- 9 Walsh PC: Anatomic radical prostatectomy: Evolution of the surgical technique. *J Urol* 1998;160(6 Pt 2):2418–2424.
- 10 Meaglia JP, Joseph AC, Chang M, Schmidt JD: Post-prostatectomy urinary incontinence: Response to behavioral training. *J Urol* 1990;144: 674–676.
- 11 Wille S, Sobottka A, Heidenreich A, Hofmann R: Pelvic floor exercises, electrical stimulation and biofeedback after radical prostatectomy: Results of a prospective randomized trial. *J Urol* 2003;170(2 Pt 1):490–493.
- 12 Floratos DL, Sonke GS, Rapidou CA, Alivizatos GJ, Deliveliotis C, Constantinides CA, Theodorou C: Biofeedback vs. verbal feedback as learning tools for pelvic muscle exercises in the early management of urinary incontinence after radical prostatectomy. *BJU Int* 2002;89: 714–719.
- 13 Van Kampen M, De Weerd W, Van Poppel H, De Ridder D, Feys H, Baert L: Effect of pelvic-floor re-education on duration and degree of incontinence after radical prostatectomy: A randomised controlled trial. *Lancet* 2000;355:98–102.
- 14 Franke JJ, Gilbert WB, Grier J, Koch MO, Shyr Y, Smith JA Jr: Early post-prostatectomy pelvic floor biofeedback. *J Urol* 2000;163: 191–193.
- 15 Zermann DH, Ishigooka M, Wunderlich H, Reichelt O, Schubert J: A study of pelvic floor function pre- and postradical prostatectomy using clinical neurourological investigations, urodynamics and electromyography. *Eur Urol* 2000;37:72–78.
- 16 Donnellan SM, Duncan HJ, MacGregor RJ, Russell JM: Prospective assessment of incontinence after radical retropubic prostatectomy: Objective and subjective analysis. *Urology* 1997;49:225–230.

## Erratum

---

Unfortunately, in the paper by Suzuki K: CA19-9 as a serum marker for poor prognosis in urothelial carcinoma. *Urol Int* 2004;73:357, the last part of the text went missing. It should now read:

‘So, the authors should examine whether hydronephrosis exists or not in their patients. I think that their results were due to not only the tumor expression of CA19-9 but also of the associated hydronephrosis. I am interested in making further investigations based on this study considering the aforementioned three points.’
